# Supplementary material
Source: MDPI journal article supplement (https://www.mdpi.com/2071-1050/15/22/16019)
Supplement: s1 [file s1 › sustainability-2664814-supplementary.pdf]

# Utilization of Microalgae for Urban Wastewater Treatment and Valorization of Treated Wastewater and Biomass for Biofertilizer Applications

Shoyeb Khan <sup>1</sup>, Mahmoud Thaher <sup>1</sup>, Mohammed Abdulquadir <sup>1</sup>, Mohammed Faisal <sup>1</sup>, Sanjeet Mehariya <sup>1</sup>, Mohammad A. A. Al-Najjar <sup>2</sup>, Hareb Al-Jabri <sup>1,3</sup> and Probir Das <sup>1,\*</sup>

<sup>1</sup> Algal Technology Program, Centre for Sustainable Development, College of Arts and Sciences, Qatar University, Doha 2713, Qatar

<sup>2</sup> Department of Pharmaceutics and Pharmaceutical Sciences, Faculty of Pharmacy, Applied Science Private University, Amman 11937, Jordan

<sup>3</sup> Department of Biological and Environmental Sciences, College of Arts and Sciences, Qatar University, Doha 2713, Qatar

\* Correspondence: probir.das@qu.edu.qa

**Table S1. Effect of N/P ratios on biomass densities of various microalgal strains cultivated in urban wastewaters.**

| Microalgal strain                                   | TN<br>concentration<br>(mg/L) | TP<br>concentration<br>(mg/L) | N/P ratio | Biomass<br>(g/L) | Reference |
|-----------------------------------------------------|-------------------------------|-------------------------------|-----------|------------------|-----------|
| <i>Arthrospira platensis</i> (Gomont)               | 21.8                          | 2.1                           | 22.9      | 0.35             | [39]      |
| <i>Scenedesmus obliquus</i>                         | 20.1                          | 2.2                           | 20.2      | 0.38             | [39]      |
| <i>Chlorella sorokiniana</i> (Shihira & R.W.Krauss) | 111.1                         | 16                            | 15.8      | 0.7              | [40]      |
| <i>Scenedesmus</i> sp.                              | 15.5                          | 0.5                           | 68.4      | 0.11             | [38]      |
| <i>Chlorella</i> sp.                                | 40.65                         | 5.6                           | 18        | 0.4              | [41]      |
